# Supplementary material for: T-bet-mediated differentiation of the activated CD8+ T cell
Source: PubMed Central journal article supplement (PMC3130140; doi:10.1002/eji.201040873), 2010-11-19
Supplement: eji0041-0060-SD1.pdf [file eji0041-0060-SD1.pdf]

# European Journal of Immunology

**Supporting Information**

**for**

**DOI 10.1002/eji.201040873**

**T-bet-mediated differentiation of the activated CD8<sup>+</sup> T cell**

Crystal J. J. Yeo and Douglas T. Fearon

## Supplementary Figure 1

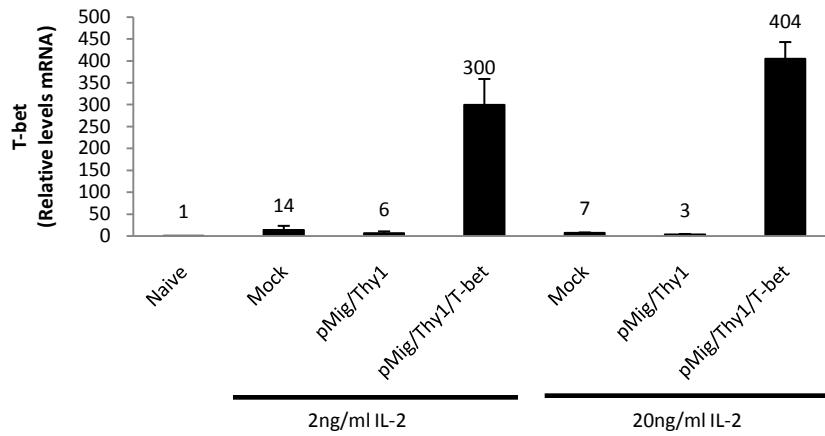

### S1: IL-2 and T-bet expression

OT-I cells were transduced, purified, and cultured with 2ng/ml IL-2 or 20ng/ml IL-2 in the presence of neutralising anti-IFN- $\gamma$ , anti-IFN- $\gamma$ R1 and anti-IL-12 antibodies. After 48 hours, RNA was extracted and assessed for T-bet mRNA by qRT-PCR relative to CD3epsilon mRNA levels. All RNA samples were done in triplicate and the "No RT" controls were negative. Cumulative means and SD are shown from 3 independent experiments each with 3 treatment replicates.
